# Supplementary material for: Expectations of Continuous Vital Signs Monitoring for Recognizing Complications After Esophagectomy: Interview Study Among Nurses and Surgeons
Source: PubMed Central journal article supplement (PMC7910120; doi:10.2196/22387), 2021-02-12
Supplement: periop_v4i1e22387_app2.pdf [file periop_v4i1e22387_app2.pdf]

### Baseline characteristics of patient population undergoing esophagectomy<sup>1</sup>

| Population characteristic                                    | Classification          | Result      |
|--------------------------------------------------------------|-------------------------|-------------|
| Number of patients                                           | N.A.                    | 280         |
| Male                                                         | N.A.                    | 224 (80%)   |
| Age at time of surgery (years)                               | N.A.                    | 64 (8.6)    |
| BMI (kg /m <sup>2</sup> )                                    | N.A.                    | 25.8 (4.1)  |
| ASA classification                                           | I                       | 36 (12.9%)  |
|                                                              | II                      | 189 (67.5%) |
|                                                              | III                     | 55 (19.6%)  |
| Comorbidities                                                | Any comorbidity         | 203 (72.5%) |
|                                                              | Cardiac comorbidity     | 56 (23.9%)  |
|                                                              | Vascular comorbidity    | 108 (46.2%) |
|                                                              | Pulmonal comorbidity    | 64 (27.4%)  |
|                                                              | Diabetes comorbidity    | 34 (14.5%)  |
|                                                              | Urological comorbidity  | 23 (9.8%)   |
|                                                              | Thrombo-embolic history | 12 (5.1%)   |
| Surgery type                                                 | Open                    | 19 (6.8%)   |
|                                                              | Minimally-invasive      | 261 (93.2%) |
| Surgical approach                                            | Transhiatal             | 15 (5.4%)   |
|                                                              | Transthoracic           | 265 (94.6%) |
| Anastomosis location                                         | Cervical                | 118 (42.1%) |
|                                                              | Thoracic                | 162 (57.9%) |
| Neoadjuvant therapy                                          | Chemotherapy            | 8 (3.0%)    |
|                                                              | Chemoradiotherapy       | 247 (92.9%) |
|                                                              | Radiotherapy            | 1 (0.4%)    |
|                                                              | No therapy              | 24 (8.6%)   |
| Peroperative complication                                    | N.A.                    | 13 (4.6%)   |
| Postoperative complication<br>(within 30 days after surgery) | Pneumonia               | 90 (32.1)   |
|                                                              | Anastomotic leak        | 62 (22.1)   |
|                                                              | Other complication      | 122 (43.6)  |
|                                                              | No complication         | 85 (30.4)   |

Values reflect the number of patients (% of total) or mean value (standard deviation). N.A.: not applicable; ASA: American Society of Anesthesiologists.

<sup>1</sup>Pooled population characteristics of patients undergoing elective esophagectomy between 2015 and 2016 in one of the three centers participating in this study.
