# Supplementary material for: Expectations of Continuous Vital Signs Monitoring for Recognizing Complications After Esophagectomy: Interview Study Among Nurses and Surgeons
Source: PubMed Central journal article supplement (PMC7910120; doi:10.2196/22387), 2021-02-12
Supplement: periop_v4i1e22387_app3.pdf [file periop_v4i1e22387_app3.pdf]

## Themes elicited during context analysis

| Main topic                                         | Theme                                                             | Specification of theme                                                                                                                                                                                                                       |
|----------------------------------------------------|-------------------------------------------------------------------|----------------------------------------------------------------------------------------------------------------------------------------------------------------------------------------------------------------------------------------------|
| Current monitoring routine                         | Caregivers policy towards speed of activating further diagnostics | The policy towards the use of diagnostic imaging differs between hospitals, as caregivers either promote early activation or a wait-and-see policy                                                                                           |
| Early recognition of complications                 | Variable presentation of deterioration                            | The presentation of deterioration differs per patient                                                                                                                                                                                        |
|                                                    | Absence of early signs                                            | Signs of deterioration are not visible in early phase of complications or in current routine measurements                                                                                                                                    |
|                                                    | Limited specificity of routine measurements                       | Abnormal results of individual routine measurements are not enough to confirm complication                                                                                                                                                   |
|                                                    | Expertise level                                                   | Abnormalities may not be recognized or acted upon by less experienced clinicians or nurses                                                                                                                                                   |
|                                                    | Incomplete or delayed measurements                                | Early signs may be missed or delayed due to delayed or incomplete measurements                                                                                                                                                               |
|                                                    | Importance of trends                                              | Trends in diagnostic test results are important to identify clinical deterioration or to recognize specific complications                                                                                                                    |
| Effectiveness of continuous vital signs monitoring | Limited sensitivity and specificity of vital signs                | Vital signs have limited sensitivity and specificity for detection of specific complications, as abnormal vital sign levels may be caused by other factors and because complications do not always present with abnormalities in vital signs |
|                                                    | Effectivity of current patient monitoring approach                | Current patient monitoring approach already promotes fast detection and response towards potential complications, and there is little room for further improvement                                                                           |
|                                                    | Early signs already seen in other measurements                    | Early signs of deterioration observed in vital signs are preceded or accompanied by signs of deterioration in other measurements or clinical observations                                                                                    |
|                                                    | Continuity of measurements can fill current time gap              | Early recognition of deterioration is expected because of the continuity of measuring, such that abnormalities are seen earlier as compared to current intermittent vital sign measurements                                                  |
|                                                    | Improved ability to identify trends                               | Early recognition of deterioration is expected because of the improved ability to identify trends                                                                                                                                            |
|                                                    | Increased awareness                                               | Early recognition of deterioration is expected because of the increased awareness to vital sign abnormalities, caused by continuous measurements or active alarms                                                                            |
|                                                    | Objective criteria for care escalation                            | Early action is promoted by providing an objective description of the patient status that can be used to justify escalation of care                                                                                                          |
|                                                    | Confirmation of deterioration                                     | Early action is promoted by providing extra confirmation of event/deterioration                                                                                                                                                              |
|                                                    | Clinical progress is awaited                                      | Early recognition of deterioration will not lead to early treatment because clinical progress is awaited                                                                                                                                     |
|                                                    | Diagnostic confirmation is awaited                                | Early recognition of deterioration will not lead to early treatment because diagnostic confirmation is awaited                                                                                                                               |
|                                                    | Need for escalation protocol                                      | It should be clearly described what vital signs values are abnormal and which action is required                                                                                                                                             |

### Themes elicited during context analysis (continued)

| Main topic                                         | Theme                                                   | Specification of theme                                                                                                                                            |
|----------------------------------------------------|---------------------------------------------------------|-------------------------------------------------------------------------------------------------------------------------------------------------------------------|
| Effectiveness of continuous vital signs monitoring | Need for training in use of technology                  | Clinical staff should be trained in how to use the monitoring system and activate measurements                                                                    |
|                                                    | Need for training in interpretation of vital signs      | Clinical staff should be trained in how to interpret the measurements                                                                                             |
|                                                    | Need for automated alarms                               | Automated alarms / notifications are important for effective monitoring                                                                                           |
|                                                    | Need for trend assessment                               | (Automated) trend assessment is desired to support identification of deterioration in vital signs                                                                 |
|                                                    | Need to retain subjective observations                  | The subjective evaluation by clinicians is important for adequate patient assessment, and should not be neglected                                                 |
|                                                    | Optimal implementation requires more insight            | Experience and further research is required to find and establish effective monitoring routines                                                                   |
| Impact of continuous vital signs monitoring        | Treatment period cannot be reduced                      | Complications require a certain treatment trajectory, which cannot be reduced with early recognition                                                              |
|                                                    | Insufficient time gain to improve clinical outcome      | The expected potential time gain is not enough to improve clinical outcome measures                                                                               |
|                                                    | Clinical outcome cannot be changed with early treatment | Clinical outcome of a given complication cannot be changed at all with early recognition or treatment                                                             |
|                                                    | Shifted treatment period                                | Early onset of treatment results in early completion, which reduced length of hospital stay                                                                       |
|                                                    | Reduction of complication severity                      | Improvement in clinical outcome effected by reduced complication severity                                                                                         |
|                                                    | Faster recovery                                         | Improvement in clinical outcome effected by faster recovery                                                                                                       |
|                                                    | Impact depends on situation                             | The clinical impact affected by complication severity and patient characteristics                                                                                 |
| Considerations for implementation                  | Relevance dependent on complication number and severity | The clinical relevance of continuous monitoring depend on the number and severity of complications                                                                |
|                                                    | Nurse workload                                          | Risk of increased nurse workload related to vital signs interpretation and response towards abnormalities                                                         |
|                                                    | Expectations towards level of care                      | Risk that the implementation of continuous monitoring will create increased expectations towards the level of care, assuming continuous surveillance and response |
|                                                    | Overdiagnosis or overtreatment                          | Risk of overdiagnosis and overtreatment                                                                                                                           |
|                                                    | Patient comfort                                         | Risk of impaired patient comfort                                                                                                                                  |
|                                                    | Patient experience                                      | Effect on patient's experience or feeling of safety                                                                                                               |
|                                                    | Financial consequences                                  | Costs or financial gains                                                                                                                                          |
|                                                    | Efficiency                                              | Efficiency related to remote access and automation                                                                                                                |
|                                                    | Alarm fatigue                                           | Risk of high (false) alarm rates and associated alarm fatigue                                                                                                     |

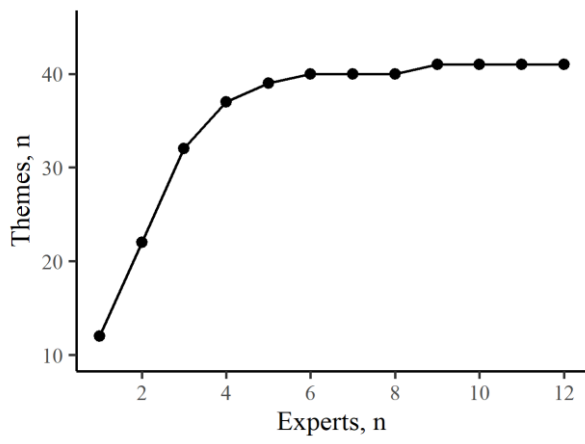

*Figure 1. Number of new themes that was elicited during context analysis in order of expert inclusion*
